# Supplementary material for: Single-source-precursor synthesis of high temperature stable SiC/C/Fe nanocomposites from a processable hyperbranched polyferrocenylcarbosilane with high ceramic yield
Source: Royal Society of Chemistry journal article supplement (doi:10.1039/c3tc32088j), 2013-11-25
Supplement: c3tc32088j.pdf [file c3tc32088j.pdf]

## Supplementary Material (ESI) for Journal of Materials Chemistry C

---

### **Single-source-precursor synthesis of high temperature stable SiC/C/Fe nanocomposites from a processible hyperbranched polyferrocenylcarbosilane with high ceramic yield**

**Zhaoju Yu,<sup>\*a</sup> Le Yang,<sup>a</sup> Hao Min,<sup>a</sup> Pei Zhang,<sup>a</sup> Cong Zhou,<sup>a</sup>  
Ralf Riedel<sup>b</sup>**

<sup>a</sup>College of Materials, Key Laboratory of High Performance Ceramic Fibers (Xiamen University), Ministry of Education, Xiamen 361005, China

<sup>\*</sup> Corresponding author. E-mail: [zhaojuyu@xmu.edu.cn](mailto:zhaojuyu@xmu.edu.cn)

<sup>b</sup>Institut für Materialwissenschaft, Technische Universität Darmstadt, D-64287  
Darmstadt, Germany

The present work opens a new synthetic route toward the preparation of high temperature stable SiC/C/Fe nanocomposites. In this paper, we investigated the relationship between nano/microstructure of the final ceramics and their properties, in a temperature range of 900-1300 °C. Further research to investigate nano/microstructure of the final ceramics at higher temperatures ( $\geq 1500$  °C) is in progress. As shown in Fig. S1, compared with the 1300 °C sample (Fig. 15), the SiFeC sample reveals an enhanced crystallization as shown in the SAED (Fig. S1(a)). In addition, the crystallites become much bigger as can be taken from the bright field lattice images (Fig. S1(b)). HRTEM imaging exhibits that  $\alpha$ -Fe crystal boundary area is also comprised of turbostratic carbon (Fig. S1(c)), and poorly organized turbostratic carbon are dispersed in an amorphous SiC(O) matrix (Fig. S1(d)). The results indicate the exclusive existence of  $\alpha$ -Fe in the SiC(O) matrix even at 1500 °C.

# Supplementary Material (ESI) for Journal of Materials Chemistry C

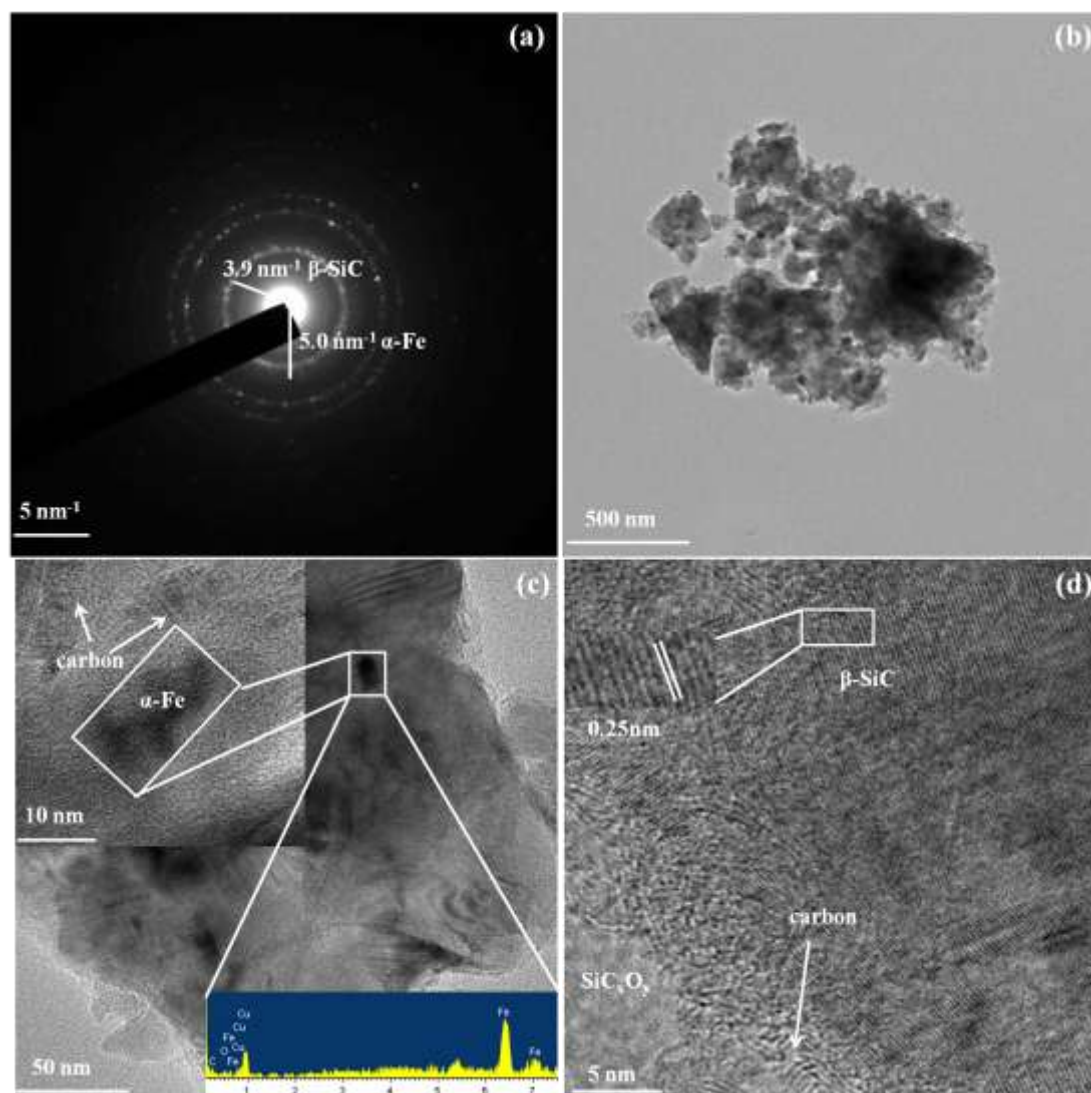

Fig. S1. (a) Selected area electron diffraction, (b) Bright field lattice images, (c) HRTEM images and (d) HRTEM images of HBPFCs-3-derived ceramics annealed at 1500 °C.
